# Supplementary figures and images for: beta1-integrin mediates myelin-associated glycoprotein signaling in neuronal growth cones
Source: Springer Nature journal article supplement (doi:10.1186/1756-6606-1-10), 2008-10-15

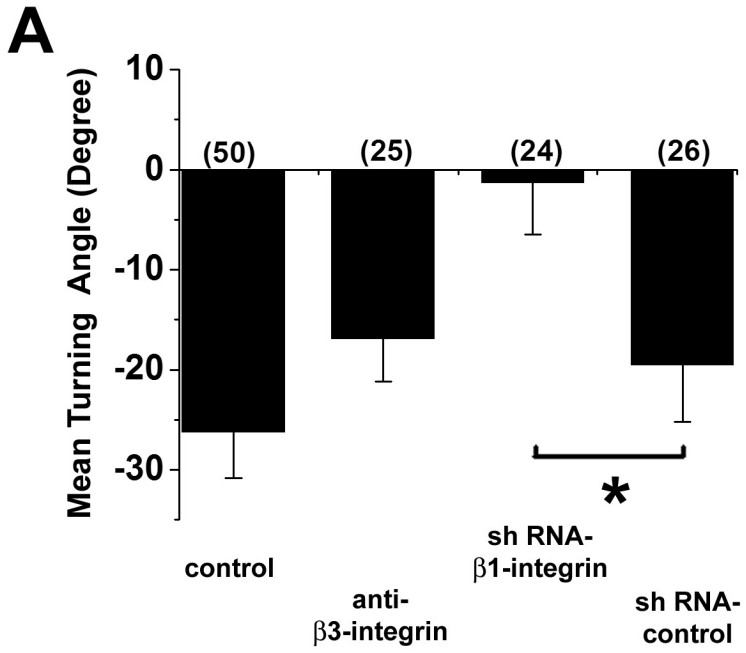

**B**

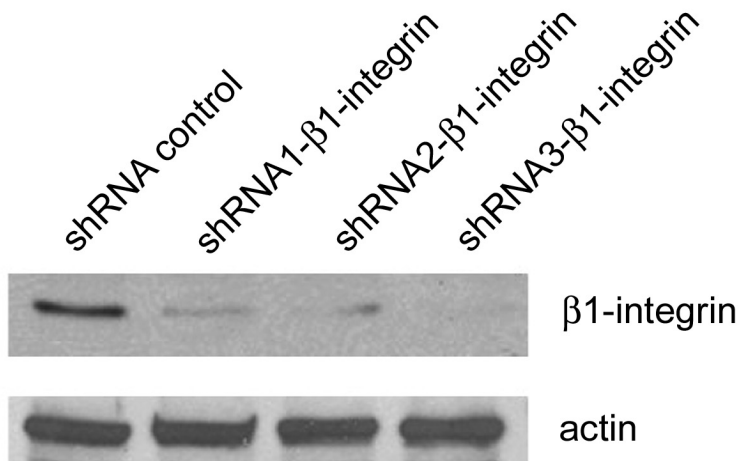

Supplement: Additional file 1 [file 1756-6606-1-10-s1.pdf]

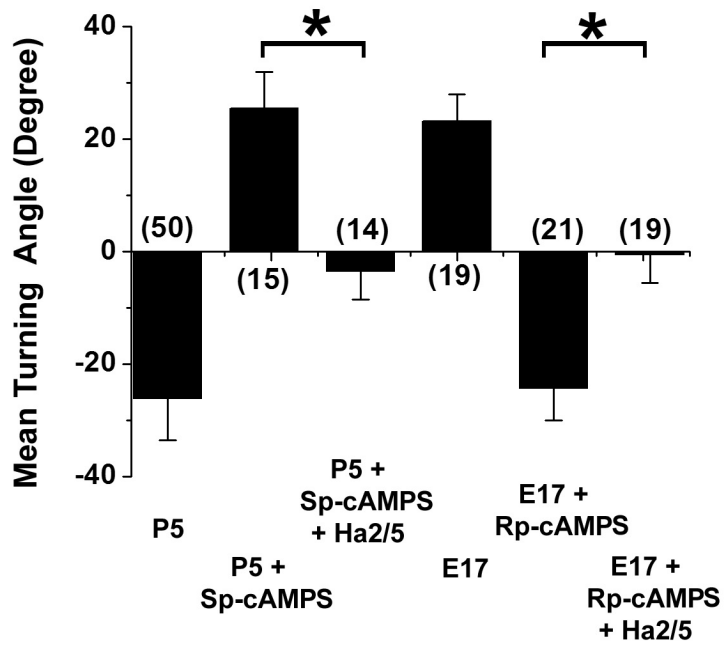

Supplement: Additional file 2 [file 1756-6606-1-10-s2.pdf]

**A**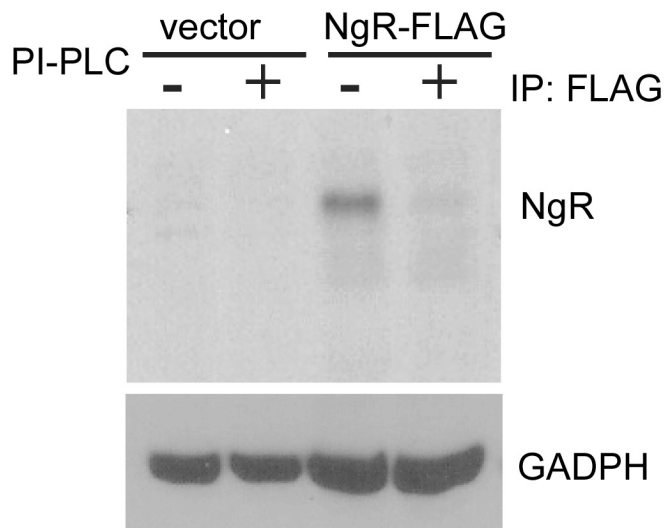**B**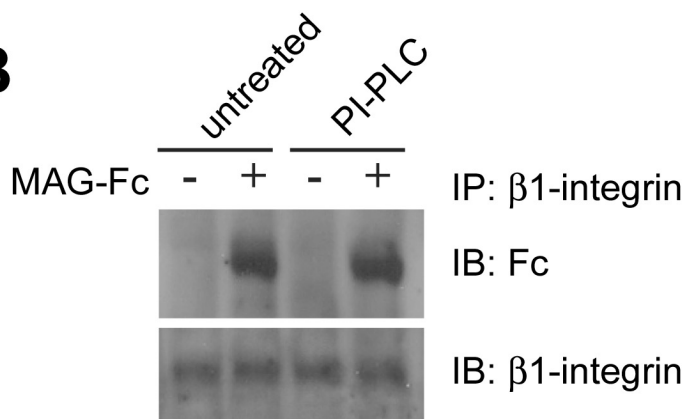

Supplement: Additional file 3 [file 1756-6606-1-10-s3.pdf]

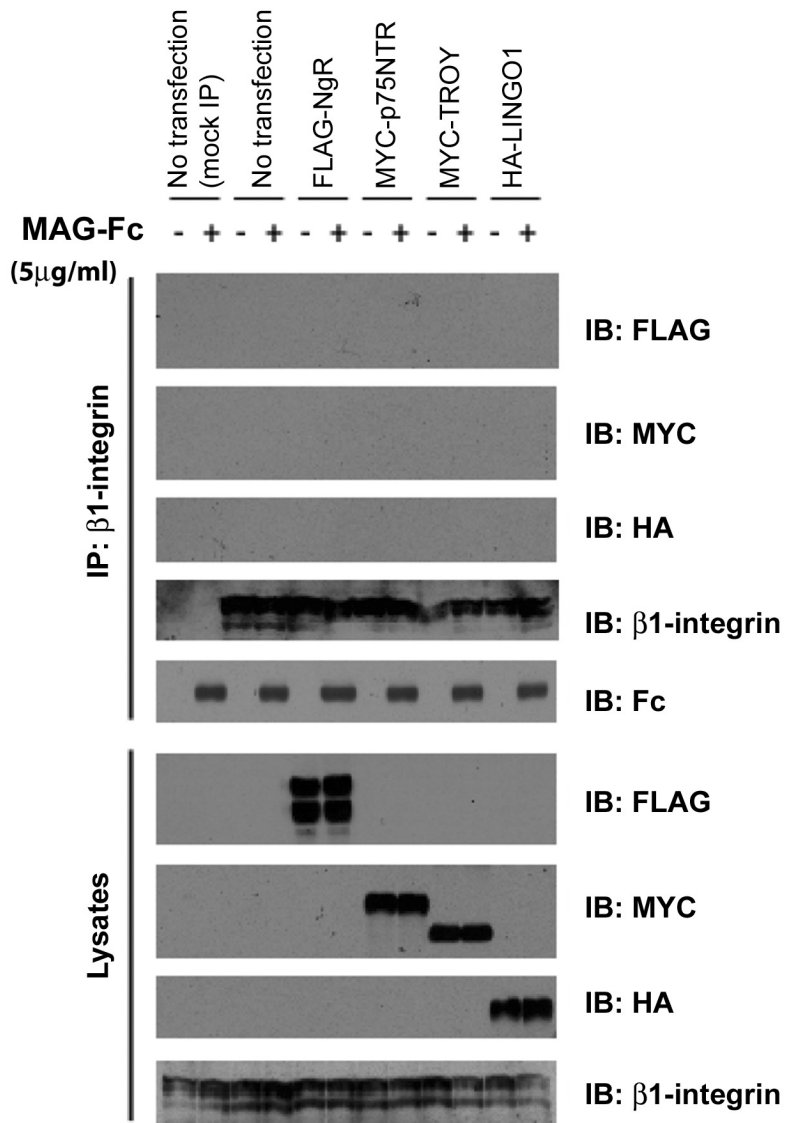

Supplement: Additional file 4 [file 1756-6606-1-10-s4.pdf]

**A**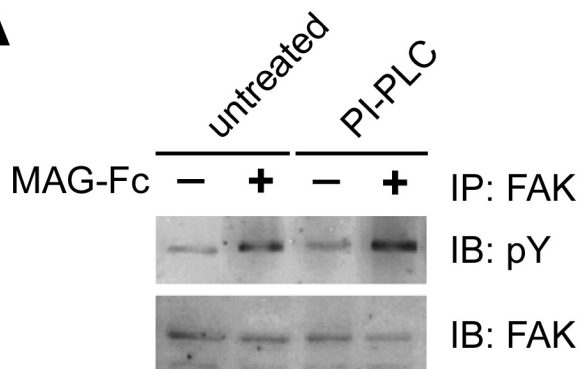**B**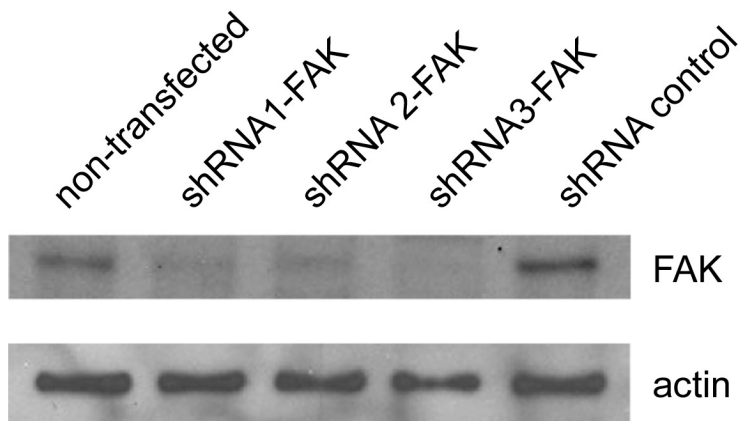

Supplement: Additional file 5 [file 1756-6606-1-10-s5.pdf]
